# Supplementary material
Source: PubMed Central journal article supplement (PMC5857983)
Supplement: supp_RA117.000425_133124_1_supp_51732_p2pxbp.pdf [file supp_RA117.000425_133124_1_supp_51732_p2pxbp.pdf]

**Table S1.** Oligonucleotide sequences.

**Table S1**

|                     |                                                                | 5'-3' Forward Sequence                                                       | 5'-3' Reverse Sequence                                                          |
|---------------------|----------------------------------------------------------------|------------------------------------------------------------------------------|---------------------------------------------------------------------------------|
|                     | L-m. <i>Oct4-3p</i> (Mut-01)                                   | AAGACTGGGACACACAGTAGAATTAAGAATTTGTTTTCCTTCAGTTC                              | GGAAGTGAAGGAAAAAAAATTTCTTAATCTACTGTGTGCCAGTCTT                                  |
|                     | L-m. <i>Oct4-3p</i> (Mut-02)                                   | ATTTTATTTATATGGGTACACAAATTAAGTACCTTCTAGACACACCAG                             | CTGGTGTGTCTAGAAGGTGACTTAATTTGTGTACCCATATAAATAAAAT                               |
|                     | L-m. <i>Oct4-5p</i> (Mut-01)                                   | GCCAGTAATGGATTCTCAAACC TTTTAAGATCTTCAAAACAGGGCCAT                            | ATGGCGCCTGTTTTGAAGATCTTAAAAGGTTTGAGAATCCATTACTGGC                               |
|                     | L-m. <i>Oct4-5p</i> (Mut-02)                                   | GGGTCTGTACACATGTCTACA TAAATTTAATAGGTCAAAGGCTTTAGAT                           | ATCTAAAGCCTTTGACCTATTTAAATTTATGTAGACATGTGTACAGACCC                              |
|                     | L-m. <i>Nanog-3p</i> (Mut-01)                                  | TTTAAAGATTTATTTATTCATTATATGTAAGTACACAAAAATGTCTTCAG<br>ACACTCCAGAAGAGGGCGTCAG | CTGACGCCCTCTTCTGGAGTGTCTGAAGACATTTTTTTGTGTACTTACATATA<br>ATGAATAAATAAATCTTTAAAA |
|                     | L-m. <i>Nanog-3p</i> (Mut-02)                                  | GACAGAAGGACCAGGAGTTTGAGGAAAAATCAGATATGCAATAAGTTCAAGG<br>C                    | GCCTTGAAGTATTGCATATCTGATTTTTCTCAAACCTCTGGTCTTCTGT<br>C                          |
|                     | L-m. <i>Nanog-5p</i> (Mut-01)                                  | TACGCAACATCTGGGCTTAAAGTCAGGGCAA AAAAAATTCCTTCTCTTCTC<br>CAAAATTTTTCATATT     | AATATGAAAATATTTGGAAGAAGGAAGGAATTTTTTTTTGCCCCTGACTTTAA<br>GCCAGATGTTGCGTA        |
| Mutation            | L-m. <i>Sox2-3p</i> (Mut-01)                                   | TGATGTTACCAGCAATGTCTGTATTTA TTAAGTGCAGAAGAAAAAATG                            | CATTTTTTCTTCTGCAGTTAATAAATACAGACATTGCTGGTAAACATCA                               |
|                     | L-m. <i>Sox2-3p</i> (Mut-02)                                   | AGTCAATTCTGAAAATTTTTCGAAATTAATAGCAGATGAGATACTGCGCC                           | GGCGCAGTATCTCATCTGCTATTAATTTGAAAATTTTCAGAATTGACT                                |
|                     | L-m. <i>Sox2-5p</i> (Mut-01)                                   | TGAGATACTGCGCCAAATCAGAAATAATTTGGCTGGGTTGGTTTTTCATTTT                         | AAAAATGAAAACCAACCCAGCCAAATTTTTCTGATTTGGCGCAGTATCTCA                             |
|                     | L-m. <i>Sox2-5p</i> (Mut-02)                                   | GCAGCTGGTACACGCAAAAGAGAAAATTTCAACAGACATATTACAGAA                             | TTCTGTAATATGTCGTTGAAATTTTTCTCTTTTGCGTGTACCAGCTGC                                |
|                     | L-m. <i>Klf4-3p</i>                                            | AGGCAACAACCCCTAAGAACAGTTAAATTTCCACAGTCCCTCCTGAG                              | CTCAGGAGGGCAGTGGAAAAATTAAGTGTCTTAGGGTTGTTTGCCCT                                 |
|                     | L-m. <i>Klf4-5p</i> (Mut-01)                                   | CCCACGTAGTGGATGTGACCCACACAAATTTAAGAGAGAGTTTCAATTTT                           | AAACTGAACTCTCTCTTAAATTTGTGTGGGTACATCCACTACGTGGG                                 |
|                     | L-m. <i>Klf4-5p</i> (Mut-02)                                   | TCCGATCTACATTGATGACCTAA AATTTA AATAAGCCTGGTTTATTTT                           | GAAATAAACCAGGCTTATTTTAAATTTTAGGTCATCAATGTAGATCGGA                               |
|                     | L-m. <i>c-Myc-3p</i>                                           | TTCCCATGTAATAGGGCCTTGA TTAATAACTTTAATAAAACGTT                                | AACGTTTTATTAAGTTATTTAATTAACAAGGCCCTATTTACATGGGAA                                |
|                     | L-m. <i>c-Myc-5p</i> (Mut-01)                                  | CGTTTGTTCCTTGCCTCTTGCTCAATAAGATAGTCCCTTCACATCAGTATC                          | GATACTGATGTGAAGGGACTATCTTTATTGAGCAAGAGGCAAGGAACAAACG                            |
|                     | L-m. <i>c-Myc-5p</i> (Mut-02)                                  | GGTACGAACACAACAAAATAACAATAAGGCCCTGTCTTGAAAACAAGCCT                           | AGGCTTGTTTTCAAGACAGGGGCTTATTGTTATTTTTGTGTGTTTCGTACC                             |
|                     | L-m. <i>Prrmt7-3p</i> (Mut-01)                                 | GCAGTGGGAAGAAAAGTAGGAGAAATAACGCCTCTCTCTGTCTGTCTGTC                           | GACAGACAGAGAGACAGGAGGCGTTATTTCTCTAGTTTTCTTCCCAGTGC                              |
|                     | L-m. <i>Prrmt7-3p</i> (Mut-02)                                 | GGCATGGCCTCAGTGTGAGATGAATAAGGGACCTGAAGGCAGGCAGGCTG                           | CAGCCTGCCTGCCTCAGGTCCTTATTTTCTCTCAGCACTGAGGCCATGCC                              |
|                     | L-m. <i>Prrmt7-5p</i> (Mut-01)                                 | GCCTATCTGCTTTCAAGGAAGTTAATAAAGTCCAGGGAAAATGGCCTCCCA                          | TGGGAGGCCATTTTCCCTGGGAGTTTATTAAGTCTCTTGAAGCAGATAGGC                             |
|                     | L-m. <i>Prrmt7-5p</i> (Mut-02)                                 | GATTGCTAAGCCCTGAGACCCAAATAAATAACTGTGGTTCACAAGGCCGTCAT<br>TC                  | GATGACGGCCTTGTGAACCACAGTTATTTTATTGGTCTCAGGGCTTAGCAA<br>TC                       |
| RT-PCR              | mGAPDH                                                         | CATGGCCTTCCGTGTTCCCTA                                                        | GCCTGCTTCACCACCTTCTT                                                            |
|                     | mPRMT7                                                         | CAGGTAGCGTCTGCCTTTGT                                                         | CAACTCAGGCCGTTTATTGATGA                                                         |
|                     | mNanog                                                         | TCTTCCGTGGTCCCCACAGTTT                                                       | GCAAGAATAGTTCTCGGGATGAA                                                         |
|                     | mSox2                                                          | GCTCGCAGACCTACATGAAC                                                         | GCCTCGGACTTGACCACAG                                                             |
|                     | mOct4                                                          | AGAGGATCACCTTGGGGTACA                                                        | CGAAGCAGCAGATGGTGGTC                                                            |
|                     | mcMyc                                                          | CACCATGCCCCCAACGTGAACCTTCACC                                                 | TTATGACCAGAGTTTCAAGCTGTTCG                                                      |
|                     | mKlf4                                                          | GTGCCCCGACTAACCCTTG                                                          | GTCGTTGAACTCCTCGGTCT                                                            |
|                     | miR-221-3p                                                     | AGCTACATTGTCTGCTGGGTTTC                                                      | *PerfeCTa Universal PCR Primer                                                  |
| miR-221-5p          | ACCTGGCATAACAATGTAGATTTCTGT                                    | *PerfeCTa Universal PCR Primer                                               |                                                                                 |
| SNORD66             | GTCAGTGCCACGTGTCTGGGCCACTGAGACCACATGATGGGATTGA<br>GGACCTGAGGAA | *PerfeCTa Universal PCR Primer                                               |                                                                                 |
| ChIP                | mir221-S1                                                      | TCCCTTCCAGAATCTCTCTTCA                                                       | GGTAATCAGCAGCTACATCTGG                                                          |
|                     | mir221-S2                                                      | ACTTCCATACATCTCTGTCTTTA                                                      | CACAATTCCTGTGACTTACCAATAG                                                       |
|                     | mir221-S3                                                      | GATTTCTGTGTTTGTAGGC                                                          | AAGAAATGATTCCAGGTAGCC                                                           |
| CRISPR-Cas9 cloning | Cas9-miR-221-1                                                 | CACCGCTGCTGGGTTTCAGGCTACC                                                    | AAACGGTAGCCTGAAACCCAGCAGC                                                       |
|                     | Cas9-miR-221-2                                                 | CACCGAGAAATCTACATTGTATGCC                                                    | AAACGGCATAACAATGTAGATTTCTC                                                      |
|                     | Cas9-miR-221-seq                                               | TCACCTATTGGTAAAGTCACA                                                        | AGCAGTATGCTAAGATGATT                                                            |
